# Supplementary material for: Refugee and Migrant Women's Views of Antenatal Ultrasound on the Thai Burmese Border: A Mixed Methods Study
Source: PLOS journal article supplement (doi:10.1371/journal.pone.0034018), 2012-04-13
Supplement: S1 (10.1371/journal.pone.0034018.s001) [file journal.pone.0034018.s001]

# Ultrasound Questionnaire

Date: |\_\_|\_|-|\_\_|\_|-|\_\_|\_| ANC code: |\_\_|\_|\_|-|\_\_|\_|\_|\_|\_|\_|

1. Religion<sup>circle</sup>: Buddhist / Christian / Muslim / Other: \_\_\_\_\_ 3. Years at school |\_\_|\_| years  
2. How many ultrasounds (US) have you had? |\_\_|\_| 4. Grade |\_\_|\_|  
5. Other \_\_\_\_\_

6. Why do we do US for pregnant women? More answers are possible for question 6-8. If you need more space to write please turn page.

- |                                                             |                                                         |
|-------------------------------------------------------------|---------------------------------------------------------|
| <input type="checkbox"/> Position <sup>1</sup>              | <input type="checkbox"/> Confirm pregnancy <sup>6</sup> |
| <input type="checkbox"/> Sex <sup>2</sup>                   | <input type="checkbox"/> How many babies <sup>7</sup>   |
| <input type="checkbox"/> Normal hands and feet <sup>3</sup> | <input type="checkbox"/> Other <sup>8</sup> : _____     |
| <input type="checkbox"/> Health of the baby <sup>4</sup>    | <input type="checkbox"/> I don't know <sup>9</sup>      |
| <input type="checkbox"/> Baby's breathing <sup>5</sup>      |                                                         |

7. At your most recent US, what did the staff explain to you before they started to scan?

- |                                                                                 |                                                                      |
|---------------------------------------------------------------------------------|----------------------------------------------------------------------|
| <input type="checkbox"/> Nothing <sup>1</sup>                                   | <input type="checkbox"/> It is safe <sup>6</sup>                     |
| <input type="checkbox"/> A machine would be used to check the baby <sup>2</sup> | <input type="checkbox"/> The reasons for the US <sup>7</sup>         |
| <input type="checkbox"/> I would need to lie down <sup>3</sup>                  | <input type="checkbox"/> Other <sup>8</sup> : _____                  |
| <input type="checkbox"/> I would need to open my sarong <sup>4</sup>            | <input type="checkbox"/> I don't know/I cannot remember <sup>9</sup> |
| <input type="checkbox"/> Not to worry <sup>5</sup>                              |                                                                      |

8. During or after the most recent US scan, what did they tell you?

- |                                                                                |                                                                      |
|--------------------------------------------------------------------------------|----------------------------------------------------------------------|
| <input type="checkbox"/> Nothing <sup>1</sup>                                  | <input type="checkbox"/> They told me the position <sup>6</sup>      |
| <input type="checkbox"/> They explained what they were looking at <sup>2</sup> | <input type="checkbox"/> They told me about a problem <sup>7</sup>   |
| <input type="checkbox"/> They said "Everything is okay" <sup>3</sup>           | <input type="checkbox"/> Other <sup>8</sup> : _____                  |
| <input type="checkbox"/> They told me that I am pregnant <sup>4</sup>          | <input type="checkbox"/> I don't know/I cannot remember <sup>9</sup> |
| <input type="checkbox"/> They told me the sex of the baby <sup>5</sup>         |                                                                      |

During your last scan: Please enter 1 answer only for question 9-21. If you need more space to write please turn page.

9. Did you feel shy? ☐ Yes<sup>1</sup> ☐ No<sup>2</sup> 10. Did you feel your heart racing or anxiety? ☐ Yes<sup>1</sup> ☐ No<sup>2</sup>
11. Did you think it was dangerous? ☐ Yes<sup>1</sup> ☐ No<sup>2</sup> ☐ I don't know<sup>3</sup> ☐ No answer<sup>4</sup>
- 12a. Did you see the screen? ☐ Yes<sup>1</sup> ☐ No<sup>2</sup> ☐ No answer<sup>3</sup> 12b. Did you want? ☐ Yes<sup>1</sup> ☐ No<sup>2</sup> ☐ I don't care<sup>3</sup>
- 13a. Did they tell the sex? ☐ Yes<sup>1</sup> ☐ No<sup>2</sup> ☐ No answer<sup>3</sup> 13b. Did you want? ☐ Yes<sup>1</sup> ☐ No<sup>2</sup> ☐ I don't care<sup>3</sup>

Write down 1,2,3 or 4 in the box to answer questions 14-17:

- |                                                                                      |                                                                                         |
|--------------------------------------------------------------------------------------|-----------------------------------------------------------------------------------------|
| <input type="checkbox"/> 1. Continue with normal antenatal care <sup>1</sup>         | <input type="checkbox"/> 3. Stop coming for antenatal care; only go to TBA <sup>3</sup> |
| <input type="checkbox"/> 2. Continue with normal ANC but also go to TBA <sup>2</sup> | <input type="checkbox"/> 4. I don't know <sup>4</sup>                                   |

14. What will you do if the US finds the baby is breech? ☐ other<sup>5</sup> \_\_\_\_\_
15. What will you do if the US finds the baby is not normal? ☐ other<sup>5</sup> \_\_\_\_\_
16. What will you do if the US finds the baby has no heart beat? ☐ other<sup>5</sup> \_\_\_\_\_
17. What will you do if the US confirms you are pregnant but you do not want to be pregnant? ☐ other<sup>5</sup> \_\_\_\_\_

18. Have you ever heard of someone coming to SMRU for US and learning from the staff that the baby will be the sex that they do *not* want, and trying to get an abortion for that reason? ☐ Yes<sup>1</sup> ☐ No<sup>2</sup> ☐ No answer<sup>3</sup>

19. Do you think US for pregnant women is useful? ☐ Yes<sup>1</sup> ☐ No<sup>2</sup> ☐ No answer<sup>3</sup>

20. In SMRU US is free, at other hospitals it costs 500 baht. Could you pay that? ☐ Yes<sup>1</sup> ☐ No<sup>2</sup> ☐ No answer<sup>3</sup>

21. Should we continue to do US in pregnancy? ☐ Yes<sup>1</sup> ☐ No<sup>2</sup> ☐ No answer<sup>3</sup>

Thank you!

Interviewer Name \_\_\_\_\_
